# Supplementary material for: The safety of acupuncture during pregnancy: a systematic review
Source: PubMed Central journal article supplement — Acupunct Med. 2014 Feb 19;32(3):257–66. doi: 10.1136/acupmed-2013-010480 (PMC4112450; doi:10.1136/acupmed-2013-010480), 2014-02-19
Supplement: acupmed-2013-010480-s1.pdf [file acupmed-2013-010480-s1.pdf]

Supplementary Table 1. Studies with incomplete AE reporting

| Author (year) / Country                  | Condition                                | AE reporting                                                                           |
|------------------------------------------|------------------------------------------|----------------------------------------------------------------------------------------|
| <b>RCTs/quasi-RCTs (n=22)</b>            |                                          |                                                                                        |
| Do (2011) Australia <sup>1</sup>         | Fetal malposition                        | The study reported that there were no AEs.                                             |
| Ekdahl (2010) Sweden <sup>2</sup>        | Low back and/or pelvic pain              | The study did not mention AEs.                                                         |
| Guittier (2009) Switzerland <sup>3</sup> | Fetal malposition                        | The study reported that there were no AEs.                                             |
| Mao (2009) China <sup>4</sup>            | Hyperemesis gravidarum                   | The study reported that there were no AEs.                                             |
| Elden (2008) Sweden <sup>5</sup>         | Low back and/or pelvic pain              | The study did not mention AEs.                                                         |
| Neri (2007) Italy <sup>6</sup>           | Fetal malposition                        | The study did not mention AEs.                                                         |
| Yang (2007) China <sup>7</sup>           | Fetal malposition                        | The study reported that there were no AEs.                                             |
| Yang (2006) China <sup>8</sup>           | Fetal malposition                        | The study reported that there were no AEs.                                             |
| Lund (2006) Sweden <sup>9</sup>          | Low back and/or pelvic pain              | The study did not mention AEs.                                                         |
| Neri (2005) Italy <sup>10</sup>          | Hyperemesis gravidarum                   | The study did not mention AEs.                                                         |
| Neri (2004) Italy <sup>11</sup>          | Fetal malposition                        | The study reported that there were no AEs.                                             |
| Manber (2004) US <sup>12</sup>           | Depression                               | The study did not mention AEs.                                                         |
| Chen (2004) China <sup>13</sup>          | Fetal malposition                        | The study reported that there were no AEs.                                             |
| Habek (2004) Croatia <sup>14</sup>       | Hyperemesis gravidarum                   | The study did not mention AEs.                                                         |
| Habek (2003) Croatia <sup>15</sup>       | Fetal malposition                        | The study reported that there were no AEs.                                             |
| Smith (2002) Australia <sup>16</sup>     | Hyperemesis gravidarum                   | The study did not mention AEs.                                                         |
| Lin (2002) China <sup>17</sup>           | Fetal malposition                        | The study reported that there were no AEs.                                             |
| Carlsson (2000) Sweden <sup>18</sup>     | Hyperemesis gravidarum                   | The study reported that there were no AEs.                                             |
| Li (1996) China <sup>19</sup>            | Fetal malposition                        | The study did not mention AEs.                                                         |
| Fan (1995) China <sup>20</sup>           | Hyperemesis gravidarum                   | The study did not mention AEs.                                                         |
| Fan (1995) China <sup>21</sup>           | Hyperemesis gravidarum                   | The study did not mention AEs.                                                         |
| Huang (1990) China <sup>22</sup>         | Fetal malposition                        | The study did not mention AEs.                                                         |
| <b>CCTs (n=4)</b>                        |                                          |                                                                                        |
| Sonia (2012) Italy <sup>23</sup>         | Fetal malposition                        | The study did not mention AEs.                                                         |
| Zhang (2003) SK <sup>24</sup>            | Hyperemesis gravidarum                   | The study did not mention AEs.                                                         |
| Kanakura (2001) Japan <sup>25</sup>      | Fetal malposition                        | The study did not mention AEs.                                                         |
| Xiong (1991) China <sup>26</sup>         | Fetal malposition                        | The study reported that there were no AEs.                                             |
| <b>Case series/reports (n=49)</b>        |                                          |                                                                                        |
| Giuseppe (2012) Italy <sup>27</sup>      | Hyperemesis gravidarum                   | The study did not mention AEs.                                                         |
| Ok (2012) SK <sup>28</sup>               | Hyperemesis gravidarum                   | The study did not mention AEs.                                                         |
| Lock (2011) UK <sup>29</sup>             | Tension-type headache                    | The study did not mention AEs.                                                         |
| Lei (2010) China <sup>30</sup>           | Bell's palsy                             | The study reported that there were no AEs.                                             |
| Tang (2010) US <sup>31</sup>             | Headache                                 | The study reported that there were no AEs.                                             |
| Lee (2010) SK <sup>32</sup>              | TA-induced pain and several symptoms     | The study reported that there were no AEs.                                             |
| Kang (2010) SK <sup>33</sup>             | Ramsay-hunt syndrome                     | The study did not mention AEs.                                                         |
| Manyande (2009) UK <sup>34</sup>         | Fetal malposition                        | The study only reported "Fewer AEs were reported" but did not mention the type of AEs. |
| O (2009) SK <sup>35</sup>                | Low back and/or pelvic pain caused by TA | The study reported that there were no AEs.                                             |
| Grabowska (2009) UK <sup>36</sup>        | Fetal malposition                        | The study did not mention AEs.                                                         |
| Gear (2008) UK <sup>37</sup>             | Hyperemesis gravidarum                   | The study did not mention AEs.                                                         |
| Rouse (2008) UK <sup>38</sup>            | Low back and/or pelvic pain              | The study reported that there were no AEs.                                             |
| Shin (2008) SK <sup>39</sup>             | Bell's palsy                             | The study did not mention AEs.                                                         |

|                                           |                                                                                                                                  |                                            |
|-------------------------------------------|----------------------------------------------------------------------------------------------------------------------------------|--------------------------------------------|
| Choi (2008) SK <sup>40</sup>              | Bell's palsy                                                                                                                     | The study did not mention AEs.             |
| Yoo (2008) SK <sup>41</sup>               | Hyperemesis gravidarum with urinary infection                                                                                    | The study did not mention AEs.             |
| Jung (2007) SK <sup>42</sup>              | Dermatosis gravidarum                                                                                                            | The study did not mention AEs.             |
| Zheng (2006) China <sup>43</sup>          | Fetal malposition                                                                                                                | The study did not mention AEs.             |
| Yoo (2006) SK <sup>44</sup>               | Hyperemesis gravidarum                                                                                                           | The study did not mention AEs.             |
| Wei (2006) SK <sup>45</sup>               | Asthma                                                                                                                           | The study did not mention AEs.             |
| Hope-Allan (2005) Australia <sup>46</sup> | Various conditions including pain-related conditions, anxiety-related conditions, and known obstetric complications of pregnancy | The study did not mention AEs.             |
| Baek (2005) SK <sup>47</sup>              | Gluteal pain                                                                                                                     | The study did not mention AEs.             |
| Cho (2005) SK <sup>48</sup>               | Trigeminal neuralgia                                                                                                             | The study did not mention AEs.             |
| Kim (2005) SK <sup>49</sup>               | Hyperemesis gravidarum                                                                                                           | The study did not mention AEs.             |
| Baek (2005) SK <sup>50</sup>              | Cervical sprain caused by TA                                                                                                     | The study did not mention AEs.             |
| Lee (2005) SK <sup>51</sup>               | Bell's palsy                                                                                                                     | The study did not mention AEs.             |
| Choi (2004) SK <sup>52</sup>              | TA-induced pain and several symptoms                                                                                             | The study did not mention AEs.             |
| Cho (2004) SK <sup>53</sup>               | Hyperemesis gravidarum                                                                                                           | The study did not mention AEs.             |
| Heo (2004) SK <sup>54</sup>               | Hyperemesis gravidarum                                                                                                           | The study did not mention AEs.             |
| Baek (2004) SK <sup>55</sup>              | Low back and flank pain caused by hydronephrosis                                                                                 | The study did not mention AEs.             |
| Forrester (2003) UK <sup>56</sup>         | Low back and/or pelvic pain                                                                                                      | The study reported that there were no AEs. |
| Schnyer (2003) US <sup>57</sup>           | Depression                                                                                                                       | The study did not mention AEs.             |
| Seo (2003) SK <sup>58</sup>               | Vaginal bleeding                                                                                                                 | The study did not mention AEs.             |
| Park (2003) SK <sup>59</sup>              | Low back and/or pelvic pain                                                                                                      | The study did not mention AEs.             |
| Choi (2003) SK <sup>60</sup>              | Bell's palsy                                                                                                                     | The study did not mention AEs.             |
| Yang (2002) SK <sup>61</sup>              | Hyperemesis gravidarum                                                                                                           | The study reported that there were no AEs. |
| Neri (2002) Italy <sup>62</sup>           | Fetal malposition                                                                                                                | The study reported that there were no AEs. |
| Jung (2002) SK <sup>63</sup>              | Dermatosis gravidarum                                                                                                            | The study did not mention AEs.             |
| Park (2001) SK <sup>64</sup>              | Low back pain with nausea                                                                                                        | The study did not mention AEs.             |
| CCPKMCC (2001) NK <sup>65</sup>           | Ascariasis                                                                                                                       | The study reported that there were no AEs. |
| CCPKMCC (2001) NK <sup>66</sup>           | Fetal malposition                                                                                                                | The study reported that there were no AEs. |
| CCPKMCC (2001) NK <sup>67</sup>           | Threatened abortion                                                                                                              | The study did not mention AEs.             |
| CCPKMCC (2001) NK <sup>68</sup>           | Fetal malposition                                                                                                                | The study did not mention AEs.             |
| CCPKMCC (2001) NK <sup>69</sup>           | Threatened abortion                                                                                                              | The study did not mention AEs.             |
| CCPKMCC (2001) NK <sup>70</sup>           | Threatened abortion                                                                                                              | The study did not mention AEs.             |
| Thomas (2000) US <sup>71</sup>            | Low back and/or pelvic pain                                                                                                      | The study did not mention AEs.             |
| Zhou (1999) China <sup>72</sup>           | Hyperemesis gravidarum                                                                                                           | The study did not mention AEs.             |
| Kim (1997) SK <sup>73</sup>               | Hyperemesis gravidarum                                                                                                           | The study did not mention AEs.             |
| Yelland (1995) UK <sup>74</sup>           | Constipation                                                                                                                     | The study did not mention AEs.             |
| Koh (1989) SK <sup>75</sup>               | Bell's palsy                                                                                                                     | The study reported that there were no AEs. |
| <b>Surveys (n=3)</b>                      |                                                                                                                                  |                                            |
| Guittier (2012) Switzerland <sup>76</sup> | Fetal malposition                                                                                                                | The study did not mention AEs.             |
| Steel (2012) Australia <sup>77</sup>      | Various conditions                                                                                                               | The study did not mention AEs.             |
| Denny (1999) UK <sup>78</sup>             | Various conditions                                                                                                               | The study did not mention AEs.             |

AEs, adverse events; CCPKMCC, Collection of Clinical Practice in Korean Medicine Compilation Committee; CCT, controlled clinical trial; NK, North Korea; RCT, randomised controlled trial; SK, South Korea; TA, traffic accident; US, United States.

## References

1. Do CK, Smith CA, Dahlen H, *et al.* Moxibustion for cephalic version: a feasibility randomised controlled trial. *BMC Complement Altern Med* 2011;11:81.
2. Ekdahl L, Petersson K. Acupuncture treatment of pregnant women with low back and pelvic pain--an intervention study. *Scand J Caring Sci* 2010;24:175-82.
3. Guittier MJ, Pichon M, Dong H, *et al.* Moxibustion for breech version: a randomised controlled trial. *Obstet Gynecol* 2009;114:1034-40.
4. Mao ZN, Liang CE. Observation on therapeutic effect of acupuncture on hyperemesis gravidarum. *Chin Acupunct Moxibust* 2009;29:973.
5. Elden H, Hagberg H, Olsen MF, *et al.* Regression of pelvic girdle pain after delivery: follow-up of a randomised single blind controlled trial with different treatment modalities. *Acta Obstet Gynecol Scand* 2008;87:201-8.
6. Neri I, De Pace V, Venturini P, *et al.* Effects of three different stimulations (acupuncture, moxibustion, acupuncture plus moxibustion) of BL.67 acupoint at small toe on fetal behavior of breech presentation. *Am J Chin Med* 2007;35:27-33.
7. Yang YK, Mao M, Hu YP, *et al.* Effect of moxibustion at Zhiyin (BL 67) to correct the fetus malposition: multi-center randomised controlled clinical study. *J Tradit Chin Med* 2007;48:1097-100.
8. Yang FQ. Comparison of knee-chest position plus moxibustion on Zhiyin with knee-chest position for breech presentation. *J Sichuan Trad Chin Med* 2006;24:106-7.
9. Lund I, Lundeberg T, Lonnberg L, *et al.* Decrease of pregnant women's pelvic pain after acupuncture: a randomised controlled single-blind study. *Acta Obstet Gynecol Scand* 2006;85:12-9.

10. Neri I, Allais G, Schiapparelli P, *et al.* Acupuncture versus pharmacological approach to reduce hyperemesis gravidarum discomfort. *Minerva Ginecol* 2005;57:471-5.
11. Neri I, Airola G, Contu G, *et al.* Acupuncture plus moxibustion to resolve breech presentation: a randomised controlled study. *J Matern Fetal Neonatal Med* 2004;15:247-52.
12. Manber R, Schnyer RN, Allen JJ, *et al.* Acupuncture: a promising treatment for depression during pregnancy. *J Affect Disord* 2004;83:89-95.
13. Chen Y, Yang LW. Moxibustion on Zhiyin plus raising buttocks in a lateral position for correction fetal presentation in 73 cases. *Clin J Tradit Chin Med* 2004;16:333.
14. Habek D, Barbir A, Habek JC, *et al.* Success of acupuncture and acupressure of the PC6 acupoint in the treatment of hyperemesis gravidarum. *Forsch Komplementarmed Klass Naturheilkd* 2004;11:20-3.
15. Habek D, Cerkez Habek J, Jagust M. Acupuncture conversion of fetal breech presentation. *Fetal Diagn Ther* 2003;18:418-21.
16. Smith C, Crowther C, Beilby J. Acupuncture to treat nausea and vomiting in early pregnancy: a randomised controlled trial. *Birth* 2002;29:1-9.
17. Lin Y, Zhang D, Hao Y. Combination of moxibustion at point Zhiyin and knee-chest position for correction of breech pregnancy in 63 cases. *Chin Acupunct Moxibust* 2002;22:811.
18. Carlsson CP, Axemo P, Bodin A, *et al.* Manual acupuncture reduces hyperemesis gravidarum: a placebo-controlled, randomised, single-blind, crossover study. *J Pain Symptom Manage* 2000;20:273-9.
19. Li Q, Wang L. Clinical observation on correcting malposition of fetus by electro-

acupuncture. *J Tradit Chin Med* 1996;16:260-2.

20. Fan YJ, Zhu ML, Fu CF. Clinical observation on the effect of moxibustion for vomiting of pregnancy. *Chin Acupunct Moxibust* 1995;15:11.

21. Fan Y. Observation on the therapeutic effect of moxibustion for treatment of pregnant vomiting *World J Acupunct-Moxibust* 1995;5:31.

22. Huang WX. Comparison study on moxibustion and knee chest position for conversion of fetal presentation. *Chin J Integrat Tradit West Med* 1990;10:105-6.

23. Sonia B, Alessandro B, Sylvie B, *et al.* Breech presentation of the fetus and traditional Chinese medicine. *Eur J Integr Med* 2012;4:56.

24. Zhang KH, Ko YM, Kim SW, *et al.* A clinical study on the effect of auricular acupuncture treatment for hyperemesis gravidarum. *J Orient Obstet Gynecol* 2003;16:195-204.

25. Kanakura Y, Kometani K, Nagata T, *et al.* Moxibustion treatment of breech presentation. *Am J Chin Med* 2001;29:37-45.

26. Xiong CH. Comparative observation on moxibustion on Zhiyin with knee-chest position for abnormal fetal position in 30 cases. *Hunan J Tradit Chin Med* 1991;6:23-24.

27. Giuseppe L, Manuela C. Acupuncture as a complementary therapy in chemotherapy induced and pregnancy-induced nausea and vomiting: The experience of a Regional Public Health Service in Aosta Valley Autonomous Region. *Eur J Integr Med* 2012;4:13.

28. Ok JY, Lee IS, Cho HS. A clinical study of hyperemesis patient treated with oriental medicine. *J Orient Obstet Gynecol* 2012;25:116-24.

29. Lock J. Acupuncture and physiotherapy for chronic tension-type headache in a

pregnant patient. AACP 2011;Autumn:73-81.

30. Lei H, Wang W, Huang G. Acupuncture benefits a pregnant patient who has Bell's palsy: a case study. J Altern Complement Med 2010;16:1011-14.

31. Tang D. Treatment of headaches during pregnancy with acupuncture. Int J Clin Acupunct 2010;19:121-22.

32. Lee SH, Park YS, Kim DC. Three cases report of patients caused by traffic accident during early pregnancy. J Orient Obstet Gynecol 2010;23:187-95.

33. Kang MS. A clinical study on the case of herpes zoster oticus occurred in pregnancy treated with bee venom pharmacopuncture. J Kor Acupunct Moxibust Soc 2010;27:155-60.

34. Manyande A, Grabowska C. Factors affecting the success of moxibustion in the management of a breech presentation as a preliminary treatment to external cephalic version. Midwifery 2009;25:774-80.

35. O KW, Ryu IH, Kim JR, *et al.* Case series of low back pain and pelvic pain caused by traffic accident during pregnancy. J Orient Obstet Gynecol 2009;22:194-204.

36. Grabowska C, Manyande A. Management of breech presentation with the use of moxibustion in women in the UK: A preliminary study. Eur J Integr Med 2009;6:38-42.

37. Gear J. Acupuncture for nausea in early pregnancy: a discussion and case. J Chin Med 2008;Feb:18-23.

38. Rouse S. The use of acupuncture in the physiotherapy treatment of pelvic pain in pregnancy. AACP 2008;2008:67-72.

39. Shin SM, Lim HJ, Lee JE, *et al.* Two case reports of the Bell's palsy occurred during pregnancy. J Orient Obstet Gynecol 2008;21:258-68.

40. Choi JH, Lee JM, Lee CH, *et al.* Clinical studies on 3 cases of Bell's palsy during pregnancy. *J Orient Obstet Gynecol* 2008;21:245-56.
41. Yoo YK, Lee JA, Kim HJ, *et al.* A case report of urinary infection in hyperemesis gravidarum. *J Orient Obstet Gynecol* 2008;21:276-85.
42. Jung AR, Jung EA, Park SE, *et al.* Two cases of dermatitis patients during pregnancy. *J Orient Obstet Gynecol* 2007;20:258-67.
43. Zheng Z. Ultrasound observation of the therapeutic effect of using acupuncture and moxibustion to correct the position of the fetus and correlated factors *Int J Clin Acupunct* 2006;15:141-44.
44. Yoo YK, Bae SJ, Kim HJ, *et al.* A case report of complaining of disturbed liver function in hyperemesis gravidarum. *J Orient Obstet Gynecol* 2006;19:279-86.
45. Wei TS, Yang SJ. The case study on one case of the asthma during the period of pregnancy. *Kor J Orient Med Prescript* 2006;14:176-83.
46. Hope-Allan N, Adams J, Sibbritt D, *et al.* The use of acupuncture in maternity care: a pilot study evaluating acupuncture service in an Australian hospital antenatal clinic. *Complement Ther Nurs Midwifery* 2005;10:229-32.
47. Baek SH, Park HJ, Kim KH, *et al.* One case of the woman suffered from the pain due to weakened gluteus medius muscle during pregnancy treated by Hwa-acupuncture. *J Orient Obstet Gynecol* 2005;18:211-18.
48. Cho JH, Jang JB, Lee KS, *et al.* A case report of trigeminal neuralgia diagnosed weakness during pregnancy. *J Orient Obstet Gynecol* 2005;18:234-41.
49. Kim SJ, Kim DC, Baek SH. Clinical study for the two cases complaining hyperemesis with vaginal bleeding or abdominal pain after IVF. *J Orient Obstet Gynecol* 2005;18:176-85.



50. Baek SH, Na HS, Park HJ, *et al.* The clinical study on one case of cervical sprain patient due to traffic accident in pregnancy. *J Orient Obstet Gynecol* 2005;18:207-17.
51. Lee JA, Ban HR, Cho SH. The case study on one case of the Bell's palsy during the period of pregnancy. *J Orient Obstet Gynecol* 2005;18:186-94.
52. Choi MS, Seung JH, Yang JM, *et al.* A study on clinical managements of traffic accident victims during pregnancy. *J Orient Obstet Gynecol* 2004;17:157-67.
53. Cho SH, Ban HR. Clinical study of the two cases of the hyperemesis. *Kor J Orient Med Prescript* 2004;12:213-20.
54. Heo JW, Cho JH, Jang JB, *et al.* The three cases on the effect of oriental medical treatment of hyperemesis gravidarum. *J Orient Obstet Gynecol* 2004;17:171-8.
55. Baek SH, Jung EA, Bae IY. A clinical study on one case of the woman suffered from both side flank and back pain due to hydronephrosis during pregnancy. *J Orient Obstet Gynecol* 2004;17:239-49.
56. Forrester M. Low back pain in pregnancy. *Acupunct Med* 2003;21:36-41.
57. Schnyer RN, Manber R, Fitzcharles AJ. Acupuncture treatment for depression during pregnancy: conceptual framework and two case reports. *Complement Health Pract Rev* 2003;8:40-53.
58. Seo JY, Kim YS, Lim EM. Clinical study on two cases of vaginal bleeding in early pregnancy. *J Orient Obstet Gynecol* 2003;16:212-9.
59. Park YE, Park YN, Ryoo KS, *et al.* Clinical study on one case of the lumbago and sciatica during pregnancy. *J Orient Obstet Gynecol* 2003;16:235-42.
60. Choi S, Park YE, Park YN, *et al.* Clinical study on one case of the Bell's palsy during the period of pregnancy. *J Orient Obstet Gynecol* 2003;16:227-34.
61. Yang SJ, Cho SH, Jin CS. Clinical study for the 8 cases of the hyperemesis

patients. J Orient Obstet Gynecol 2002;15:190-9.

62. Neri I, Fazzio M, Menghini S, *et al.* Non-stress test changes during acupuncture plus moxibustion on BL67 point in breech presentation. J Soc Gynecol Investig 2002;9:158-62.

63. Jung SH, Cho JH, Jang JB, *et al.* The one case of dermatosis gravidarum patient who has an aspect of Bullous pemphigoid of pregnancy. J Orient Obstet Gynecol 2002;15:172-80.

64. Park KM, Jeong JH, Yoo DY. Clinical study on one case of the lumbago patient during pregnancy with pernicious vomiting. J Orient Obstet Gynecol 2001;14:199-208.

65. Collection of Clinical Practice in Korean Medicine. Treatment of 50 cases of ascariasis in pregnant women. Collection of Clinical Practice in Korean Medicine. Seoul: Yeogang, 2001.

66. Collection of Clinical Practice in Korean Medicine. Treatment of 51 cases of fetal malposition by electroacupuncture at Zhiyin (BL67). Collection of Clinical Practice in Korean Medicine. Seoul: Yeogang, 2001.

67. Collection of Clinical Practice in Korean Medicine. Acupuncture for threatened abortion. Collection of Clinical Practice in Korean Medicine. Seoul: Yeogang, 2001.

68. Collection of Clinical Practice in Korean Medicine. Moxibustion at Zhiyin (BL67) to correct fetal malposition. Collection of Clinical Practice in Korean Medicine. Seoul: Yeogang, 2001.

69. Collection of Clinical Practice in Korean Medicine. Moxibustion at Yinli (LR11) to treat threatened abortion. Collection of Clinical Practice in Korean Medicine. Seoul: Yeogang, 2001.

70. Collection of Clinical Practice in Korean Medicine. Herbal medicine and moxibustion to treat threatened abortion. Collection of Clinical Practice in Korean Medicine. Seoul: Yeogang, 2001.
71. Thomas CT, Napolitano PG. Use of acupuncture for managing chronic pelvic pain in pregnancy. A case report. *J Reprod Med* 2000;45:944-6.
72. Zhou CL. Acupuncture for vomitus gravidarum. *Int J Clin Acupunct* 1999;10:335-6.
73. Kim KS, Baek SH. One case report of hyperemesis gravidarum. *J Orient Obstet Gynecol* 1997;10:159-68.
74. Yelland S. Using acupuncture in midwifery care. *Mod Midwife* 1995;5:8-11.
75. Koh HK, Kim CH, Lee KS. 8 case series of Bell's palsy during pregnancy. *J Orient Obstet Gynecol* 1989:59-62.
76. Guittier MJ, Pichon M, Irion O, *et al.* Recourse to alternative medicine during pregnancy: motivations of women and impact of research findings. *J Altern Complement Med* 2012;18:1147-53.
77. Steel A, Adams J, Sibbritt D, *et al.* Utilisation of complementary and alternative medicine (CAM) practitioners within maternity care provision: results from a nationally representative cohort study of 1,835 pregnant women. *BMC Pregnancy Childbirth* 2012;12:146.
78. Denny M. Acupuncture in pregnancy. Setting up a clinic within the NHS. *Pract Midwife* 1999;2:29-31.
