# Supplementary material for: The safety of acupuncture during pregnancy: a systematic review
Source: PubMed Central journal article supplement — Acupunct Med. 2014 Feb 19;32(3):257–66. doi: 10.1136/acupmed-2013-010480 (PMC4112450; doi:10.1136/acupmed-2013-010480), 2014-02-19
Supplement: acupmed-2013-010480-s2.pdf [file acupmed-2013-010480-s2.pdf]

Supplementary Table 2. Mild/Moderate adverse events in acupuncture studies for pregnant women

| Author (year) Country                            | Condition/mean gestational weeks                       | Acupuncture group (A) and control group (C)                                                     | How AE data were collected                     | Details of AEs                                                                                                                                                                                                                          | Incidence per group                                                                                                                                                        | Severity <sup>†</sup>                        | Association with acupuncture <sup>‡</sup>                          | Practitioner  |
|--------------------------------------------------|--------------------------------------------------------|-------------------------------------------------------------------------------------------------|------------------------------------------------|-----------------------------------------------------------------------------------------------------------------------------------------------------------------------------------------------------------------------------------------|----------------------------------------------------------------------------------------------------------------------------------------------------------------------------|----------------------------------------------|--------------------------------------------------------------------|---------------|
| <b>RCTs/quasi-RCTs</b>                           |                                                        |                                                                                                 |                                                |                                                                                                                                                                                                                                         |                                                                                                                                                                            |                                              |                                                                    |               |
| Vas (2013) <sup>1</sup><br>Spain                 | Fetal malposition/<br>A: 34.0<br>C1: 33.0<br>C2: 34.0  | A: Moxa plus usual care<br>C1: Sham moxa plus usual care<br>C2: Usual care                      | (Presumably) Participant/obstetrician reported | <b>Maternal:</b><br>Burn during combustion of the moxa<br>Dizziness<br>Gastrointestinal disturbances (heartburn, nausea and vomiting)<br>Mild hypertensive disorders<br>Oligohydramnios<br>Abdominal pain                               | (Probably A or C1) 1/3730<br><br>A 2/1865; C1 2/1865<br>8/NA<br>7/NA<br>2/NA<br>C1 1/1865                                                                                  | Mild                                         | Possible                                                           | Family member |
| Guerreiro da Silva (2012) <sup>2</sup><br>Brazil | Tension-type headache/<br>A: 19.8<br>C: 19.4           | A: MA plus usual care<br>C: Usual care                                                          | (Presumably) participant reported              | <b>Maternal:</b><br>Ecchymosis at needling points                                                                                                                                                                                       | A 2/200                                                                                                                                                                    | Mild                                         | Certain                                                            | Acupuncturist |
| Manber (2010) <sup>3</sup><br>United States      | Depression/<br>A: 19.8<br>C1: 21.3<br>C2: 21.1         | A: MA<br>C1: Sham MA<br>C2: Prenatal massage                                                    | Participant/practitioner reported              | <b>Maternal:</b><br>Transient discomfort at needling points<br>Local bleeding<br>Tiredness<br><br>Irritability or agitation<br>Sleep disturbance<br>Headache<br>Nausea<br>Worsened symptom<br>Transient discomfort related with massage | A 14/456; C1 7/407<br><br>A 1/456<br>A 10/456; C1 9/407; C2 4/NA<br>A 2/456; C1 2/407<br>A 1/456; C1 2/407<br>A 3/456; C1 1/407<br>A 2/456<br>A 1/456; C1 1/407<br>C2 5/NA | Mild<br>Mild<br>Mild<br>Mild<br>Mild<br>Mild | Certain<br>Certain<br>Possible<br>Possible<br>Possible<br>Possible | Acupuncturist |
| Guerreiro da Silva (2009) <sup>4</sup><br>Brazil | Dyspepsia/<br>A: 20.5<br>C: 21.3                       | A: MA<br>C: No MA                                                                               | (Presumably) participant reported              | <b>Maternal:</b><br>Ecchymosis at needling points                                                                                                                                                                                       | A 1/201                                                                                                                                                                    | Mild                                         | Certain                                                            | Acupuncturist |
| Wang (2009) <sup>5</sup><br>United States        | Low back and pelvic pain/<br>A: 30<br>C1: 29<br>C2: 29 | A: AA plus PRLP self-care <sup>§</sup><br>C1: Sham AA plus PRLP self-care<br>C2: PRLP self-care | (Presumably) Participant reported              | <b>Maternal:</b><br>Transient ear tenderness resolved spontaneously<br>Bed rest after the study period                                                                                                                                  | A 1/112; C1 3/104<br><br>A 1/112; C1 1/104; C2 1/NA                                                                                                                        | Mild<br>Mild                                 | Certain<br>Possible                                                | Acupuncturist |

|                                                  |                                                        |                                                                                                     |                                                |                                                                                                                                                                                                                                                                                                                                                                                         |                                                                                                                                                                                                                                    |                                                                                                                                              |                                                                                                                                                                                                                                             |               |
|--------------------------------------------------|--------------------------------------------------------|-----------------------------------------------------------------------------------------------------|------------------------------------------------|-----------------------------------------------------------------------------------------------------------------------------------------------------------------------------------------------------------------------------------------------------------------------------------------------------------------------------------------------------------------------------------------|------------------------------------------------------------------------------------------------------------------------------------------------------------------------------------------------------------------------------------|----------------------------------------------------------------------------------------------------------------------------------------------|---------------------------------------------------------------------------------------------------------------------------------------------------------------------------------------------------------------------------------------------|---------------|
| Elden (2008) <sup>6</sup><br>Sweden              | Pelvic girdle pain/<br>A: 22.4<br>C: 23.6              | A: MA plus usual care<br>C: Sham MA plus usual care                                                 | Participant reported                           | <b>Maternal:</b><br>Fainting<br>Slight bleeding<br>Haematoma<br>Needle pain<br>Drowsiness                                                                                                                                                                                                                                                                                               | A 5/672; C 4/624<br>A 35/672; C 34/624<br>A 17/672; C 17/624<br>A 12/672; C 13/624<br>A 3/672; C 2/624                                                                                                                             | Moderate<br>Mild<br>Mild<br>Mild<br>Mild                                                                                                     | Probable<br>Certain<br>Certain<br>Certain<br>Possible                                                                                                                                                                                       | Midwife       |
| Guerreiro da Silva (2007) <sup>7</sup><br>Brazil | Emotional complaints**/<br>A: 19.9<br>C: 21.0          | A: MA plus counseling with or without phytomedicine<br>C: Counselling with or without phytomedicine | (Presumably) participant/obstetrician reported | <b>Maternal:</b><br>Ecchymosis at needling points                                                                                                                                                                                                                                                                                                                                       | A 4/253                                                                                                                                                                                                                            | Mild                                                                                                                                         | Certain                                                                                                                                                                                                                                     | Acupuncturist |
| Guerreiro da Silva (2005) <sup>8</sup><br>Brazil | Insomnia/<br>A: 20.6<br>C: 22.2                        | A: MA plus sleep hygiene<br>C: Sleep hygiene**                                                      | (Presumably) participant reported              | <b>Maternal:</b><br>Ecchymosis at needling points                                                                                                                                                                                                                                                                                                                                       | A 1/125                                                                                                                                                                                                                            | Mild                                                                                                                                         | Certain                                                                                                                                                                                                                                     | Acupuncturist |
| Elden (2005) <sup>9-10</sup><br>Sweden           | Pelvic girdle pain/<br>A: 24.4<br>C1: 24.4<br>C2: 24.4 | A: MA plus usual care<br>C1: Usual care<br>C2: Usual care plus stabilizing exercise                 | (Presumably) Participant/obstetrician reported | <b>Maternal:</b><br>Needle pain<br>Worsened symptom<br>Unpleasant with treatment<br>Drowsiness<br>Feeling energised<br>Headache plus severe drowsiness<br>Headache only<br>Rash at needling points<br>Nausea<br>Feeling faint<br>Sweating<br>Dizziness<br>Thoracic pain<br>Low back pain<br>Discomfort because of rubbing from pelvic belt<br>Uterine contraction<br>Premature bleeding | A 23/1380<br>A 15/1380; C1 2/NA; C2 2/NA<br>A 5/1380<br>A 12/1380<br>A 1/1380<br>A 1/1380<br>A 2/1380<br>A 4/1380<br>A 4/1380<br>A 4/1380<br>A 4/1380<br>A 4/1380<br>C2 1/NA<br>C2 17/NA<br>C1 5/NA<br>C1 1/NA; C2 1/NA<br>C2 1/NA | Mild<br>Mild<br>Mild<br>Mild<br>Mild<br>Mild<br>Mild<br>Mild<br>Mild<br>Mild<br>Mild<br>Mild<br>Mild<br>Mild<br>Mild<br>Mild<br>Mild<br>Mild | Certain<br>Possible<br>Probable<br>Possible<br>Possible<br>Possible<br>Possible<br>Possible<br>Possible<br>Possible<br>Possible<br>Possible<br>Possible<br>Possible<br>Possible<br>Possible<br>Possible<br>Possible<br>Possible<br>Possible | Acupuncturist |
| Du (2005) <sup>11</sup><br>China                 | Fetal malposition/<br>24-28                            | A: Moxa plus knee-chest position<br>C: Knee-chest position                                          | (Presumably) Participant/obstetrician reported | <b>Maternal:</b><br>Abdominal pain                                                                                                                                                                                                                                                                                                                                                      | C 5/NA                                                                                                                                                                                                                             |                                                                                                                                              |                                                                                                                                                                                                                                             | NR            |
| Cardini (2005) <sup>12</sup><br>Italy            | Breech presentation/<br>32.4-33.4                      | A: Moxa<br>C: No moxa                                                                               | (Presumably) Participant/obstetrician reported | <b>Maternal:</b><br>Unpleasant odour with or without nausea and throat problems<br>Abdominal pain because of contractions                                                                                                                                                                                                                                                               | A 14/1085<br>A 11/1085                                                                                                                                                                                                             | Mild<br>Mild                                                                                                                                 | Certain<br>Possible                                                                                                                                                                                                                         | Participant   |

|                                                   |                                                 |                                                                                                                   |                                                  |  |                                                                                                                                                                                                                              |                                                                                                                                                    |                                                              |                                                                                             |               |
|---------------------------------------------------|-------------------------------------------------|-------------------------------------------------------------------------------------------------------------------|--------------------------------------------------|--|------------------------------------------------------------------------------------------------------------------------------------------------------------------------------------------------------------------------------|----------------------------------------------------------------------------------------------------------------------------------------------------|--------------------------------------------------------------|---------------------------------------------------------------------------------------------|---------------|
|                                                   |                                                 |                                                                                                                   |                                                  |  | Other less frequently problems                                                                                                                                                                                               | A 2/1085                                                                                                                                           | UA                                                           | UA                                                                                          |               |
| Guerreiro da Silva (2004) <sup>13</sup><br>Brazil | Low back pain/<br>A: 19.9<br>C: 21.0            | A: MA plus medication <sup>††</sup><br>C: Medication                                                              | (Presumably) participant/obstetrician reported   |  | <b>Maternal:</b><br>Small bruise or ecchymosis<br>Pain                                                                                                                                                                       | A 5/270<br>A 1/270                                                                                                                                 | Mild<br>Mild                                                 | Certain<br>UA                                                                               | Acupuncturist |
| Kvorning (2004) <sup>14</sup><br>Sweden           | Low back and pelvic pain/<br>A: 30<br>C: 30     | A: MA<br>C: No MA                                                                                                 | Participant/midwife reported                     |  | <b>Maternal:</b><br>Local pain<br>Heat or sweating<br>Local haematoma<br>Tiredness<br>Nausea<br>Weakness                                                                                                                     | A 6/222<br>A 5/222<br>A 2/222<br>A 2/222<br>A 2/222<br>A 1/222                                                                                     | Mild<br>Mild<br>Mild<br>Mild<br>Mild<br>Mild                 | UA<br>Possible<br>Certain<br>Possible<br>Possible<br>Possible                               | NR            |
| Smith (2002) <sup>15-16</sup><br>Australia        | Nausea and vomiting/<br>8.5                     | A1: Traditional MA plus usual care<br>A2: PC6 MA plus usual care<br>C1: Sham MA plus usual care<br>C2: Usual care | Participant reported / collected from case notes |  | <b>Fetal:</b><br>Birth weight small for gestational age                                                                                                                                                                      | A1 8/668; A2 5/672; C1 7/668; C2 7/NA                                                                                                              | Mild                                                         | Unlikely                                                                                    | Acupuncturist |
| Knight (2001) <sup>17</sup><br>UK                 | Nausea and vomiting/<br>A: 7.8<br>C: 8.0        | A: MA<br>C: Sham MA                                                                                               | Participant reported                             |  | <b>Maternal:</b><br>Tiredness<br>Sleep disturbance<br>Heaviness of arms<br>More energy<br>Altered taste<br>Bruise<br>Pressure in nose<br>Headache<br>Increased vomiting<br>Flatulence<br>Vivid dreams<br>Feeling of coldness | A 2/103; C 2/100<br>A 2/103<br>A 2/103<br>A 1/103<br>A 1/103; C 2/100<br>A 1/103<br>A 1/103<br>A 1/103<br>C 1/100<br>C 1/100<br>C 1/100<br>C 1/100 | Mild<br>Mild<br>Mild<br>Mild<br>Mild<br>Mild<br>Mild<br>Mild | Possible<br>Possible<br>Possible<br>Possible<br>Possible<br>Certain<br>Possible<br>Possible | Acupuncturist |
| Wedenberg (2000) <sup>18</sup><br>Sweden          | Low back and pelvic pain/<br>A: 24.2<br>C: 24.2 | A: AA with or without MA<br>C: Physiotherapy                                                                      | Participant reported                             |  | <b>Maternal:</b><br>Small subcutaneous haematomas in the ear<br>Uterine contraction<br>Preeclampsia                                                                                                                          | A 2/300<br>C 3/192<br>C 1/192                                                                                                                      | Mild                                                         | Certain                                                                                     | NR            |
| Cardini (1998) <sup>19</sup><br>China             | Fetal malposition/<br>33                        | A: Moxa<br>C: Usual care                                                                                          | (Presumably) participant/obstetrician reported   |  | <b>Maternal:</b><br>Braxton Hicks contraction<br>Breech engagement<br>Sense of tenderness and pressure in the epigastric region<br>Epigastric crushing (one of the hypochondria)                                             | A 1/1779<br>A 1/1779<br>NR<br>NR                                                                                                                   | Mild<br>Mild                                                 | Possible<br>Possible                                                                        | Participant   |

---

**CCTs**


---

|                                       |                             |                                   |                                    |                                                                                                     |                                             |      |          |  |             |
|---------------------------------------|-----------------------------|-----------------------------------|------------------------------------|-----------------------------------------------------------------------------------------------------|---------------------------------------------|------|----------|--|-------------|
| Liang (2004) <sup>20</sup><br>China   | Fetal malposition/<br>≥ 28  | A: Moxa<br>C: Knee-chest position | (Presumably) participant reported  | <b>Maternal:</b><br>Dizziness<br>Chest discomfort<br>Nausea                                         | C 74/3416<br>C 74/3416<br>C 74/3416         |      |          |  | NR          |
| Cardini (1993) <sup>21</sup><br>Italy | Fetal malposition/<br>32-33 | A: Moxa<br>C: No moxa             | (Presumably) obstetrician reported | <b>Fetal:</b><br>Multiple twists (2-3) of the umbilical cord around the neck/shoulder during labour | A 4/25 <sup>§§</sup> / A 3/25 <sup>§§</sup> | Mild | Unlikely |  | Participant |

### Case series

|                                          |                                                                         |       |                                         |                                                                                                                                                                                                                                                                                                                                          |                                                                                                                                                                                                                                                                                                                                                       |                                                                                                                          |                                                                                                                                                                          |  |         |
|------------------------------------------|-------------------------------------------------------------------------|-------|-----------------------------------------|------------------------------------------------------------------------------------------------------------------------------------------------------------------------------------------------------------------------------------------------------------------------------------------------------------------------------------------|-------------------------------------------------------------------------------------------------------------------------------------------------------------------------------------------------------------------------------------------------------------------------------------------------------------------------------------------------------|--------------------------------------------------------------------------------------------------------------------------|--------------------------------------------------------------------------------------------------------------------------------------------------------------------------|--|---------|
| De Jonge-Vors (2011) <sup>22</sup><br>UK | Back pain, sciatica, rib flare, SPD/>28                                 | A: MA | (Presumably) participant reported       | <b>Maternal:</b><br>Over exerted<br>Worsened condition                                                                                                                                                                                                                                                                                   | 3/43 <sup>§§</sup><br>3/43 <sup>§§</sup>                                                                                                                                                                                                                                                                                                              | Mild<br>Mild                                                                                                             | Possible<br>Possible                                                                                                                                                     |  | Midwife |
| Kvorning (2001) <sup>23</sup><br>Sweden  | Low back and pelvic pain/2 <sup>nd</sup> and 3 <sup>rd</sup> trimesters | A: MA | Midwife collected data from a case book | <b>Maternal:</b><br>Transient premature labour<br>Dizziness<br>Tiredness<br>Local subcutaneous bleeding<br>Local pain<br>Local anaesthesia<br>Uterine contraction<br>Nausea<br>Thirst<br>Discomfort at needling points<br>Sweating<br>Accentuated pain<br>Sadness<br>Verified sudden transient fall in blood pressure during stimulation | 1/167 <sup>§§</sup><br>9/167 <sup>§§</sup><br>7/167 <sup>§§</sup><br>3/167 <sup>§§</sup><br>5/167 <sup>§§</sup><br>2/167 <sup>§§</sup><br>2/167 <sup>§§</sup><br>1/167 <sup>§§</sup><br>1/167 <sup>§§</sup><br>1/167 <sup>§§</sup><br>1/167 <sup>§§</sup><br>1/167 <sup>§§</sup><br>1/167 <sup>§§</sup><br>1/167 <sup>§§</sup><br>1/167 <sup>§§</sup> | Mild<br>Mild<br>Mild<br>Mild<br>Mild<br>Mild<br>Mild<br>Mild<br>Mild<br>Mild<br>Mild<br>Mild<br>Mild<br>Mild<br>Moderate | Possible<br>Possible<br>Possible<br>Certain<br>UA<br>Possible<br>Possible<br>Possible<br>Possible<br>Certain<br>Possible<br>Possible<br>Possible<br>Possible<br>Probable |  | Midwife |

### Case reports

|                                         |                               |             |                                            |                                                                                                                                                                           |              |              |                      |  |    |
|-----------------------------------------|-------------------------------|-------------|--------------------------------------------|---------------------------------------------------------------------------------------------------------------------------------------------------------------------------|--------------|--------------|----------------------|--|----|
| Ahn (2011) <sup>24</sup><br>South Korea | External epicondylitis/25     | MA plus BVP | (Presumably) patient/practitioner reported | <b>Maternal:</b><br>Mild oedema<br>Itching                                                                                                                                | 1/5<br>2/5   | Mild<br>Mild | Unlikely<br>Unlikely |  | NR |
| Bourne (2007) <sup>25</sup><br>UK       | Pelvic girdle pain/25         | MA          | (Presumably) patient/practitioner reported | <b>Maternal:</b><br>Slightly bleeding from BL27                                                                                                                           | 1/4          | Mild         | Certain              |  | NR |
| Cummings (2003) <sup>26</sup><br>UK     | Low back pain/early pregnancy | MA plus EA  | Patient/practitioner reported              | <b>Maternal:</b><br>Tattooing of the skin at needling points<br>Shooting sensation with intense paresthesia down the lateral side of the left leg to the foot by needling | 1/18<br>1/18 | Mild<br>Mild | Certain<br>Certain   |  | NR |

\*The incidence was calculated as the number of AEs per number of acupuncture sessions. When the information was not

available, the number of participants replaced the number of acupuncture sessions.

<sup>†</sup>Severity of the AEs was assessed using the National Cancer Institute Common Terminology Criteria for Adverse Events (CTCAE) scale v4.0<sup>14</sup>; mild, moderate, severe, life-threatening, and death.

<sup>‡</sup>Association with acupuncture was evaluated using the WHO-UMC Causality categories<sup>15</sup>; certain, probable/likely, possible, unlikely, conditional/unclassified, and unassessable/unclassifiable.

<sup>§</sup>Rest as desired, taking acetaminophen 650 mg every six hours if needed, and/or applying topical warm and cold compresses.

<sup>\*\*</sup>Nervousness, irritability, weepiness, affective lability, poor concentration and mild anxiety and depression.

<sup>††</sup>Fixed routine, bath before bed, no working late, use of relaxation techniques, and routine posture for sleep.

<sup>‡‡</sup>Paracetamol 500 mg and hyoscine 10 mg.

<sup>§§</sup>The number of participants replaced the number of acupuncture sessions because information was not available.

AA, auricular acupuncture; AE, adverse event; BVP, bee venom pharmacopuncture; CCT, controlled clinical trial; EA, electroacupuncture; MA, manual acupuncture; Moxa, moxibustion; NA, not applicable; NR, not reported; PRLP, pregnancy-related low back and posterior pelvic pain; RCT, randomised controlled trial; SPD, symphysis pubis dysfunction; UA, unassessable due to lack of information.

## References

1. Vas J, Aranda-Regules JM, Modesto M, *et al.* Using moxibustion in primary healthcare to correct non-vertex presentation: a multicentre randomised controlled trial. *Acupunct Med* 2013;31:31-8.
2. Guerreiro da Silva JB, Nakamura MU, Cordeiro JA, *et al.* Acupuncture for tension-type headache in pregnancy: A prospective, randomised, controlled study. *Eur J Integr Med* 2012;4:366-70.
3. Manber R, Schnyer RN, Lyell D, *et al.* Acupuncture for depression during pregnancy: a randomized controlled trial. *Obstet Gynecol* 2010;115:511-20.
4. Guerreiro da Silva JB, Nakamura MU, Cordeiro JA, *et al.* Acupuncture for dyspepsia in pregnancy: a prospective, randomised, controlled study. *Acupunct Med* 2009;27:50-3.
5. Wang SM, Dezinno P, Lin EC, *et al.* Auricular acupuncture as a treatment for pregnant women who have low back and posterior pelvic pain: a pilot study. *Am J Obstet Gynecol* 2009;201:271 e1-9.
6. Elden H, Fagevik-Olsen M, Ostgaard HC, *et al.* Acupuncture as an adjunct to standard treatment for pelvic girdle pain in pregnant women: randomised double-blinded controlled trial comparing acupuncture with non-penetrating sham acupuncture. *BJOG* 2008;115:1655-68.
7. Guerreiro da Silva JB. Acupuncture for mild to moderate emotional complaints in pregnancy--a prospective, quasi-randomised, controlled study. *Acupunct Med* 2007;25:65-71.
8. Guerreiro da Silva JB, Nakamura MU, Cordeiro JA, *et al.* Acupuncture for insomnia in pregnancy--a prospective, quasi-randomised, controlled study. *Acupunct*

*Med* 2005;23:47-51.

9. Elden H, Ladfors L, Olsen MF, *et al.* Effects of acupuncture and stabilising exercises as adjunct to standard treatment in pregnant women with pelvic girdle pain: randomised single blind controlled trial. *BMJ* 2005;330:761.

10. Elden H, Ostgaard HC, Fagevik-Olsen M, *et al.* Treatments of pelvic girdle pain in pregnant women: adverse effects of standard treatment, acupuncture and stabilising exercises on the pregnancy, mother, delivery and the fetus/neonate. *BMC Complement Altern Med* 2008;8:34.

11. Du YH, Xue AJ. Clinical observation of integrative medicine to correct malposition in 50 cases. *Modern J Integr Trad Chin West Med* 2005;14:2727.

12. Cardini F, Lombardo P, Regalia AL, *et al.* A randomised controlled trial of moxibustion for breech presentation. *BJOG* 2005;112:743-7.

13. Guerreiro da Silva JB, Nakamura MU, Cordeiro JA, *et al.* Acupuncture for low back pain in pregnancy--a prospective, quasi-randomised, controlled study. *Acupunct Med* 2004;22:60-7.

14. Kvorning N, Holmberg C, Grennert L, *et al.* Acupuncture relieves pelvic and low-back pain in late pregnancy. *Acta Obstet Gynecol Scand* 2004;83:246-50.

15. Smith C, Crowther C. The placebo response and effect of time in a trial of acupuncture to treat nausea and vomiting in early pregnancy. *Complement Ther Med* 2002;10:210-6.

16. Smith C, Crowther C, Beilby J. Pregnancy outcome following women's participation in a randomised controlled trial of acupuncture to treat nausea and vomiting in early pregnancy. *Complement Ther Med* 2002;10:78-83.

17. Knight B, Mudge C, Openshaw S, *et al.* Effect of acupuncture on nausea of

pregnancy: a randomized, controlled trial. *Obstet Gynecol* 2001;97:184-8.

18. Wedenberg K, Moen B, Norling A. A prospective randomized study comparing acupuncture with physiotherapy for low-back and pelvic pain in pregnancy. *Acta Obstet Gynecol Scand* 2000;79:331-5.

19. Cardini F, Weixin H. Moxibustion for correction of breech presentation: a randomized controlled trial. *JAMA* 1998;280:1580-4.

20. Liang JL, Chen SR, Li YP. Comparative analysis of moxibustion at Zhiyin acupoint and knee-chest posture in correcting breech presentation, report of 320 cases. *Chin Med* 2004;17:11-2.

21. Cardini F, Marcolongo A. Moxibustion for correction of breech presentation: a clinical study with retrospective control. *Am J Chin Med* 1993;21:133-8.

22. De Jonge-Vors C. Reducing the pain: midwifery acupuncture service audit in Birmingham. *Practising Midwife* 2011;14:22-6.

23. Kvorning N, Grennert L, Aberg A, *et al.* Acupuncture for lower back and pelvic pain in late pregnancy: a retrospective report on 167 consecutive cases. *Pain Med* 2001;2:204-7.

24. Ahn BJ, Song HS. A case report of patient in pregnancy with external epicondylitis. *J Kor Acupunct Moxibust Soc* 2011;28:137-41.

25. Bourne A. The use of acupuncture as a treatment for pelvic girdle pain during pregnancy in a multiparous woman. *AACP* 2007;2007:77-85.

26. Cummings M. Acupuncture for low back pain in pregnancy. *Acupunct Med* 2003;21:42-6.
