# Supplementary material for: The safety of acupuncture during pregnancy: a systematic review
Source: PubMed Central journal article supplement — Acupunct Med. 2014 Feb 19;32(3):257–66. doi: 10.1136/acupmed-2013-010480 (PMC4112450; doi:10.1136/acupmed-2013-010480), 2014-02-19
Supplement: acupmed-2013-010480-s3.pdf [file acupmed-2013-010480-s3.pdf]

Supplementary Table 3. Severe adverse events/death in acupuncture studies for pregnant women

| Author (year) Country                       | Condition/ mean gestational weeks                     | Acupuncture group (A) and control group (C)                                | How AE data were collected                      | Details of AEs                                                                                                                                                                                                                                                                                                                                                                | Incidence per group                                                                                        | Severity <sup>†</sup>      | Association with acupuncture <sup>‡</sup> | Practitioner  |
|---------------------------------------------|-------------------------------------------------------|----------------------------------------------------------------------------|-------------------------------------------------|-------------------------------------------------------------------------------------------------------------------------------------------------------------------------------------------------------------------------------------------------------------------------------------------------------------------------------------------------------------------------------|------------------------------------------------------------------------------------------------------------|----------------------------|-------------------------------------------|---------------|
| <b>RCTs/quasi-RCTs</b>                      |                                                       |                                                                            |                                                 |                                                                                                                                                                                                                                                                                                                                                                               |                                                                                                            |                            |                                           |               |
| Vas (2013) <sup>1</sup><br>Spain            | Fetal malposition/<br>A: 34.0<br>C1: 33.0<br>C2: 34.0 | A: Moxa plus usual care<br>C1: Sham moxa plus usual care<br>C2: Usual care | (Presumably) Participant/ obstetrician reported | <b>Maternal:</b><br>Did not progress due to lack of uterine contractions<br>PROM<br><b>Fetal:</b><br>Fetal hiccup<br>Cord pathology                                                                                                                                                                                                                                           | 6/NA<br>5/NA<br>5/NA<br>6/NA                                                                               |                            |                                           | Family member |
| Manber (2010) <sup>2</sup><br>United States | Depression/<br>A: 19.8<br>C1: 21.3<br>C2: 21.1        | A: MA<br>C1: Sham MA<br>C2: Prenatal massage                               | Participant/ practitioner reported              | <b>Maternal:</b><br>Preeclampsia<br>Preterm delivery of twins<br>Pregnancy loss<br>Hospitalisation for oesophageal spasms<br>Hospitalisation for dehydration and low amniotic fluid<br>Hospitalisation for isolated atrial fibrillation<br>Hospitalisation for premature contractions<br><b>Fetal:</b><br>Neonatal death<br><br>Receiving prolonged NIC<br>Congenital defects | A 2/456<br>A 1/456<br>C1 1/407<br>C2 1/NA<br>C1 1/407<br>C2 1/NA<br>C2 1/NA<br>A 1/456<br>A 1/456; C2 1/NA | Severe<br>Severe           | Unlikely<br>Unlikely                      | Acupuncturist |
| Guittier (2008) <sup>3</sup><br>Switzerland | Fetal malposition/<br>34-36                           | A: Moxa<br>C: No moxa                                                      | (Presumably) Participant/ obstetrician reported | <b>Maternal:</b><br>Hypertension, later developed preeclampsia<br>Cesaerean delivery<br>PROM                                                                                                                                                                                                                                                                                  | A 1/56<br>A 1/56<br>A 1/56                                                                                 | Severe<br>Severe<br>Severe | Unlikely<br>Unlikely<br>Unlikely          | NR            |
| Du (2005) <sup>4</sup><br>China             | Fetal malposition/<br>24-28                           | A: Moxa plus knee-chest position<br>C: Knee-chest position                 | (Presumably) Participant/ obstetrician reported | <b>Maternal:</b><br>Vaginal redness<br>Vaginal running water<br>Placental abruption<br><b>Fetal:</b><br>Abnormal fetal heart rate                                                                                                                                                                                                                                             | C 5/NA<br>C 3/NA<br>C 3/NA<br>C 5/NA                                                                       | Severe<br>Severe           | Unlikely<br>Unlikely                      | NR            |
| Cardini (2005) <sup>5</sup>                 | Fetal malposition/                                    | A: Moxa<br>C: No moxa                                                      | (Presumably) Participant/                       | <b>Maternal:</b><br>Preterm delivery at 34 weeks <sup>§</sup>                                                                                                                                                                                                                                                                                                                 | A 2/1085                                                                                                   | Severe                     | Unlikely                                  | Participant   |

|                                          |                             |                                                                                                                   |                                                                                                               |                                                                                                                                                                                                                                                                                                                                                                                                                                                                                                                                                                                                                                                                       |                                                                                                                                                                                                                                                                                                                                                                                                                                                                              |                                                                                                                                                                           |                                                                                                                                                                                                                                  |               |  |  |  |  |  |
|------------------------------------------|-----------------------------|-------------------------------------------------------------------------------------------------------------------|---------------------------------------------------------------------------------------------------------------|-----------------------------------------------------------------------------------------------------------------------------------------------------------------------------------------------------------------------------------------------------------------------------------------------------------------------------------------------------------------------------------------------------------------------------------------------------------------------------------------------------------------------------------------------------------------------------------------------------------------------------------------------------------------------|------------------------------------------------------------------------------------------------------------------------------------------------------------------------------------------------------------------------------------------------------------------------------------------------------------------------------------------------------------------------------------------------------------------------------------------------------------------------------|---------------------------------------------------------------------------------------------------------------------------------------------------------------------------|----------------------------------------------------------------------------------------------------------------------------------------------------------------------------------------------------------------------------------|---------------|--|--|--|--|--|
| Italy                                    | 32.4-33.4                   |                                                                                                                   | obstetrician reported                                                                                         |                                                                                                                                                                                                                                                                                                                                                                                                                                                                                                                                                                                                                                                                       |                                                                                                                                                                                                                                                                                                                                                                                                                                                                              |                                                                                                                                                                           |                                                                                                                                                                                                                                  |               |  |  |  |  |  |
| Smith (2002) <sup>6-7</sup><br>Australia | Nausea and vomiting/<br>8.5 | A1: Traditional MA plus usual care<br>A2: PC6 MA plus usual care<br>C1: Sham MA plus usual care<br>C2: Usual care | Participant reported or study investigator collected data by a telephone with participants or from case notes | <b>Maternal:</b><br>Pregnancy termination due to unspecified reasons<br>Antepartum haemorrhage/abruption or placenta praevia<br>Hypertension<br>Preeclampsia**<br>Preterm delivery<br>Miscarriage<br><b>Fetal:</b><br>Stillbirth<br>Congenital abnormality<br>Musculoskeletal disorders<br>congenital hip dislocations (8)<br>polydactyly (1)<br>Cardiovascular disorders (all congenital heart defects)<br>Gastrointestinal disorders<br>pyloric stenosis (1)<br>cleft lip (2)<br>Urogenital disorders<br>hypospadias (1)<br>undescended testes (2)<br>Metabolic disorders<br>microphthalmia (1)<br>cystic fibrosis (1)<br>Chromosomal abnormality<br>Neonatal death | A1 2/668; C1 2/668<br>A1 2/668; A2 4/672; C1 6/668; C2 4/NA<br>A1 6/668; A2 10/672; C1 10/668; C2 5/NA<br>A1 11/668; A2 7/672; C1 8/668; C2 7/NA<br>A1 9/668; A2 5/672; C1 6/668; C2 12/NA<br>A1 4/668; A2 11/672; C1 6/668; C2 9/NA<br>A1 1/668; C1 1/668; C2 4/NA<br>A1 6/668; A2 5/672; C1 6/668; C2 5/NA<br>A1 4/668; A2 2/672; C1 2/668; C2 1/NA<br>A1 1/668; A2 1/672; C1 2/668<br>A2 2/672; C1 1/668<br>A1 1/668; C2 2/NA<br>C1 1/668; C2 1/NA<br>C2 1/NA<br>C1 1/668 | Severe<br>Severe<br>Severe<br>Severe<br>Severe<br>Severe<br>Death related to AE<br>Severe<br>Severe<br>Severe<br>Severe<br>Severe<br>Severe<br>Severe<br>Severe<br>Severe | Unlikely<br>Unlikely<br>Unlikely<br>Unlikely<br>Unlikely<br>Unlikely<br>Unlikely<br>Unlikely<br>Unlikely<br>Unlikely<br>Unlikely<br>Unlikely<br>Unlikely<br>Unlikely<br>Unlikely<br>Unlikely<br>Unlikely<br>Unlikely<br>Unlikely | Acupuncturist |  |  |  |  |  |
| Cardini (1998) <sup>8</sup><br>China     | Fetal malposition/<br>33    | A: Moxa<br>C: Usual care                                                                                          | (Presumably) participant/obstetrician reported                                                                | <b>Maternal:</b><br>Tachycardia and atrial sinus arrhythmia<br>PROM<br>Preterm delivery <sup>††</sup><br><b>Fetal:</b><br>Intrauterine fetal death                                                                                                                                                                                                                                                                                                                                                                                                                                                                                                                    | A 1/1779<br>A 4/1779; C 12/NA<br>A 2/1779; C 3/NA<br>C 1/NA                                                                                                                                                                                                                                                                                                                                                                                                                  | Severe<br>Severe<br>Severe<br>Severe                                                                                                                                      | Unlikely<br>Unlikely<br>Unlikely<br>Unlikely                                                                                                                                                                                     | Participant   |  |  |  |  |  |

\*The incidence was calculated as the number of AEs per number of acupuncture sessions. When the information was not

available, the number of participants replaced the number of acupuncture sessions.

†Severity of the AEs was assessed using the National Cancer Institute Common Terminology Criteria for Adverse Events (CTCAE) scale v4.0<sup>14</sup>; mild, moderate, severe, life-threatening, and death.

‡Association with acupuncture was evaluated using the WHO-UMC Causality categories<sup>15</sup>; certain, probable/likely, possible, unlikely, conditional/unclassified, and unassessable/unclassifiable.

§One was caused by PROM after five days of treatment. The other was due to uterine contractions which began on the 10<sup>th</sup> day of treatment, just after sexual intercourse, and were preceded by blood loss and suspected PROM.

\*\*Blood pressure  $\geq$  140/90 mmHg, proteinuria  $\geq$  0.3 g/IL from the 20<sup>th</sup> week of pregnancy.

††Two preterm deliveries in acupuncture group were all at 37 weeks. Three preterm deliveries in control group occurred at 34, 35, and 37 weeks, respectively.

AE, adverse event; CCT, controlled clinical trial; MA, manual acupuncture; Moxa, moxibustion; NA, not applicable; NIC, neonatal intensive care; NR, not reported; PROM, premature rupture of the membranes; RCT, randomised controlled trial.

## References

1. Vas J, Aranda-Regules JM, Modesto M, *et al.* Using moxibustion in primary healthcare to correct non-vertex presentation: a multicentre randomised controlled trial. *Acupunct Med* 2013;31:31-8.
2. Manber R, Schnyer RN, Lyell D, *et al.* Acupuncture for depression during pregnancy: a randomized controlled trial. *Obstet Gynecol* 2010;115:511-20.
3. Guittier MJ, Klein TJ, Dong H, *et al.* Side-effects of moxibustion for cephalic version of breech presentation. *J Altern Complement Med* 2008;14:1231-3.
4. Du YH, Xue AJ. Clinical observation of integrative medicine to correct malposition in 50 cases. *Modern J Integr Trad Chin West Med* 2005;14:2727.
5. Cardini F, Lombardo P, Regalia AL, *et al.* A randomised controlled trial of moxibustion for breech presentation. *BJOG* 2005;112:743-7.
6. Smith C, Crowther C. The placebo response and effect of time in a trial of acupuncture to treat nausea and vomiting in early pregnancy. *Complement Ther Med* 2002;10:210-6.
7. Smith C, Crowther C, Beilby J. Pregnancy outcome following women's participation in a randomised controlled trial of acupuncture to treat nausea and vomiting in early pregnancy. *Complement Ther Med* 2002;10:78-83.
8. Cardini F, Weixin H. Moxibustion for correction of breech presentation: a randomized controlled trial. *JAMA* 1998;280:1580-4.
