# Supplementary material for: The safety of acupuncture during pregnancy: a systematic review
Source: PubMed Central journal article supplement — Acupunct Med. 2014 Feb 19;32(3):257–66. doi: 10.1136/acupmed-2013-010480 (PMC4112450; doi:10.1136/acupmed-2013-010480), 2014-02-19
Supplement: acupmed-2013-010480-s4.pdf [file acupmed-2013-010480-s4.pdf]

Supplementary Table 4. Details of acupuncture intervention in the included studies

| Author (year)                                    | Style of Acupuncture treatment       | Regimen                                                                                   | Acupoints                                                                                                                                                                                     | Practitioner                 | Control                                                                      |
|--------------------------------------------------|--------------------------------------|-------------------------------------------------------------------------------------------|-----------------------------------------------------------------------------------------------------------------------------------------------------------------------------------------------|------------------------------|------------------------------------------------------------------------------|
| <b>RCTs/quasi-RCTs</b>                           |                                      |                                                                                           |                                                                                                                                                                                               |                              |                                                                              |
| Vas (2013) <sup>1</sup><br>Spain                 | Indirect moxa by means of moxa stick | Once daily for two wks (14 sessions)                                                      | BL67                                                                                                                                                                                          | Family member                | C1: Sham moxa (SP1) plus usual care<br>C2: Usual care                        |
| Guerreiro da Silva (2012) <sup>2</sup><br>Brazil | MA                                   | Once a wk, occasionally twice when it was deemed necessary, for eight wks (8-12 sessions) | Standardised points:<br>EX-HN1, GV20, bilateral LR3, LI4, LU7, GB21, GB41<br>Additional points:<br>Up to six points were permitted.                                                           | Acupuncturist                | C: Usual care                                                                |
| Manber (2010) <sup>3</sup><br>United States      | MA                                   | Twice a wk for the first four wks and weekly for four more wks (12 sessions)              | Individualised acupoints according to the principles of TCM and following a published standardised treatment manual.                                                                          | Acupuncturist                | C1: Sham MA (nonspecific acupoints)<br>C2: Prenatal massage                  |
| Guerreiro da Silva (2009) <sup>4</sup><br>Brazil | MA                                   | Once a wk, occasionally twice when it was deemed necessary, for eight wks (8-12 sessions) | Pre-programmed points + optional points (up to four points)<br>The most commonly used points were: LI4, PC6, CV12, ST21, LR13, ST36, SP4 and ST44.                                            | Acupuncturist                | C: None                                                                      |
| Wang (2009) <sup>5</sup><br>United States        | AA                                   | Once a wk for two wks (two sessions)                                                      | Shenmen (TF2), Kidney (CW8), Analgesia (SC7) (one side of participant's ear)                                                                                                                  | Acupuncturist                | C1: Wrist (SF5), Shoulder (SF2), Extra-auricular point<br>C2: PRLP self-care |
| Elden (2008) <sup>6</sup><br>Sweden              | MA                                   | Twice a wk for four wks and once a wk for next four wks (12 sessions)                     | GV20, bilateral LI4, BL 26,28,32,33,54,60, KI11, GB30, ST36, EX21<br>In addition, one or two trigger points in the gluteal area could be used instead of one or two local acupuncture points. | Midwife                      | C: Sham MA (non-penetrating)                                                 |
| Guittier (2008) <sup>7</sup><br>Switzerland      | Indirect moxa by means of moxa stick | Every other day (range 2-9, median five sessions)                                         | BL67                                                                                                                                                                                          | NR                           | C: None                                                                      |
| Guerreiro da Silva (2007) <sup>8</sup><br>Brazil | MA                                   | Once a wk, occasionally twice when it was deemed necessary, for eight wks (8-12 sessions) | Standardised points:<br>EX-HN1, GV20, CV17, bilateral HT7, PC6, LU9, ST36, LR3<br>Additional points :<br>Up to four points were permitted.                                                    | Acupuncturist                | C: Counselling with or without phytomedicine                                 |
| Guerreiro da Silva (2005) <sup>9</sup><br>Brazil | MA                                   | Once a wk, occasionally twice when it was deemed necessary, for eight wks (8-12 sessions) | Standardised points:<br>EX-HN1, GV20, CV17, bilateral HT7, PC6, GB21, HN14<br>Additional points :<br>Up to four points were permitted.                                                        | Acupuncturist                | C: Sleep hygiene <sup>†</sup>                                                |
| Elden (2005) <sup>10-11</sup><br>Sweden          | MA                                   | Twice a wk for six wks (12 sessions)                                                      | GV20, bilateral LI4, BL26,32,33,54,60, KI11, GB30, SP12, ST36, EX21                                                                                                                           | Acupuncturist                | C1: Usual care<br>C2: Usual care and stabilising exercises                   |
| Du (2005) <sup>12</sup><br>China                 | Moxa                                 | (Presumably) once daily for five days (five sessions)                                     | BL67                                                                                                                                                                                          | NR                           | C: Knee-chest position                                                       |
| Cardini (2005) <sup>13</sup>                     | Indirect moxa by means of moxa       | Twice a day for two wks (14-28 sessions)                                                  | BL67                                                                                                                                                                                          | Participants with or without | C: None                                                                      |

|                                                   |                                      |                                                                                                                               |                                                                                                                                                                                                                                                                          |                                             |                                                                       |
|---------------------------------------------------|--------------------------------------|-------------------------------------------------------------------------------------------------------------------------------|--------------------------------------------------------------------------------------------------------------------------------------------------------------------------------------------------------------------------------------------------------------------------|---------------------------------------------|-----------------------------------------------------------------------|
| Italy                                             | stick                                |                                                                                                                               |                                                                                                                                                                                                                                                                          | partner/helper                              |                                                                       |
| Guerreiro da Silva (2004) <sup>14</sup><br>Brazil | MA                                   | Once a wk, occasionally twice when it was deemed necessary, for eight wks (8-12 sessions)                                     | Standardised points:<br>KI3, SI3, BL62, BL40, TE5, GB30, GB41, and the <i>huatojiaji</i> points, located along the spinal column, 1cm from the midline.<br>Additional points:<br>Up to four points were permitted.                                                       | Acupuncturist                               | C: Analgesics (paracetamol 500mg) and anti-spasmodics (hyoscine 10mg) |
| Kvorning (2004) <sup>15</sup><br>Sweden           | MA                                   | Twice a wk for two wks and then no more than once a wk until delivery or complete recovery (range 3-11, mean six sessions)    | LR3, GV20, local tender points (If the response was insufficient, BL60, SI3 or one of the following locations (BL22-26, the minimal gluteal muscle tendon 3-4cm distal to the anterior superior iliac spine, the sacroiliac tendons, or at the symphysis) was combined.) | NR                                          | C: None                                                               |
| Smith (2002) <sup>16-17</sup><br>Australia        | MA                                   | Twice a wk for one wk and then once a wk for three wks (five sessions)                                                        | A1: ST19-21, KI20-21, CV10-14<br>A2: PC6                                                                                                                                                                                                                                 | Acupuncturist                               | C1: Sham MA (nonspecific acupoints) plus usual care<br>C2: Usual care |
| Knight (2001) <sup>18</sup><br>UK                 | MA                                   | Twice a wk for one wk and then once a wk for two wks (four sessions)                                                          | Stomach and spleen <i>qi</i> deficiency: CV12, bilateral ST36, SP4, PC6<br>Stomach fire: CV12, bilateral ST44, PC6<br>Heat in heart and disharmony of liver: CV12, bilateral ST34, PC6                                                                                   | Acupuncturist                               | C: Sham MA <sup>†</sup>                                               |
| Wedenberg (2000) <sup>19</sup><br>Sweden          | AA with or without MA                | Three times a wk for two wks and then twice a wk for two wks (ten sessions)                                                   | AA: BI26-30, BI60, CW2<br>MA: local points                                                                                                                                                                                                                               | NR                                          | C: Physiotherapy                                                      |
| Cardini (1998) <sup>20</sup><br>China             | Indirect moxa by means of moxa rolls | Once (in the first 87 participants) or twice (in the last 43 participants) daily for 7-14 days (range 7-28, mean 14 sessions) | BL67                                                                                                                                                                                                                                                                     | Participants with or without partner/helper | C: Usual care                                                         |
| <b>CCTs</b>                                       |                                      |                                                                                                                               |                                                                                                                                                                                                                                                                          |                                             |                                                                       |
| Liang (2004) <sup>21</sup><br>China               | Moxa                                 | Twice daily for seven days, with additional seven days if the fetus persisted in the breech presentation (14-28 sessions)     | BL67                                                                                                                                                                                                                                                                     | NR                                          | C: Knee-chest position                                                |
| Cardini (1993) <sup>22</sup><br>Italy             | Moxa                                 | Once daily for 5-40 days (5-40 sessions)                                                                                      | BL67                                                                                                                                                                                                                                                                     | Participants and partner                    | C: None                                                               |
| <b>Case series</b>                                |                                      |                                                                                                                               |                                                                                                                                                                                                                                                                          |                                             |                                                                       |
| De Jonge-Vors (2011) <sup>23</sup><br>UK          | MA                                   | Once a wk                                                                                                                     | NR                                                                                                                                                                                                                                                                       | Midwife                                     | No control group                                                      |
| Kvorning (2001) <sup>24</sup><br>Sweden           | MA                                   | ≥ two sessions                                                                                                                | GV20, SI3, SP9, LR3, BL57, 60, GB34, ST36, LI4 + local tender points in the lower back and girdle regions                                                                                                                                                                | Midwife                                     | No control group                                                      |
| <b>Case reports</b>                               |                                      |                                                                                                                               |                                                                                                                                                                                                                                                                          |                                             |                                                                       |
| Ahn (2011) <sup>25</sup><br>South Korea           | MA plus BVP                          | five sessions                                                                                                                 | MA: LI11, TE5, LI12, SI3<br>BVP: tender points                                                                                                                                                                                                                           | NR                                          | No control group                                                      |

|                                     |            |                                                            |                                                                                                                                                       |    |                  |
|-------------------------------------|------------|------------------------------------------------------------|-------------------------------------------------------------------------------------------------------------------------------------------------------|----|------------------|
| Bourne (2007) <sup>26</sup><br>UK   | MA         | During the treatment, the day 3, 8, 11, 15 (four sessions) | GV20, bilateral BL25-28, 40, 54, LI4, GB30                                                                                                            | NR | No control group |
| Cummings (2003) <sup>27</sup><br>UK | MA plus EA | 18 sessions                                                | A combination of periosteal needling around the left L5/S1 facet joint and needling tender or trigger points in quadratus lumborum and gluteus medius | NR | No control group |

\*Acupuncture point LI5 refers to 5<sup>th</sup> point of large intestine meridian and extra points have different nomenclature (e.g., Ex-UE3 means 3<sup>rd</sup> extra point in upper extremity).

†Avoid stimulants, heavy meals and liquid excess before bed time, and establish a set bed time ritual including: fixed routine, bath before bed, no working late, use of relaxation techniques, and routine posture for sleep.

‡Specific locations were, on the left side, the radial styloid, tibial tuberosity and fifth or sixth rib 8 cm from the midline, and on the right side, the medial malleolus.

AA, auricular acupuncture; Acupoint, acupuncture point; BVP, bee venom pharmacopuncture; C, control; CCT, controlled clinical trial; CW, concha wall zone; EA, electroacupuncture; MA, manual acupuncture; Moxa, moxibustion; NR, not reported; RCT, randomised controlled trial; SC, superior concha; SF, scaphoid fossa zone; TCM, traditional Chinese medicine; TF, triangular fossa zone; wk, week.

## References

1. Vas J, Aranda-Regules JM, Modesto M, *et al.* Using moxibustion in primary healthcare to correct non-vertex presentation: a multicenter randomised controlled trial. *Acupunct Med* 2013;31:31-8.
2. Guerreiro da Silva JB, Nakamura MU, Cordeiro JA, *et al.* Acupuncture for tension-type headache in pregnancy: A prospective, randomised, controlled study. *Eur J Integr Med* 2012;4:366-70.
3. Manber R, Schnyer RN, Lyell D, *et al.* Acupuncture for depression during pregnancy: a randomised controlled trial. *Obstet Gynecol* 2010;115:511-20.
4. Guerreiro da Silva JB, Nakamura MU, Cordeiro JA, *et al.* Acupuncture for dyspepsia in pregnancy: a prospective, randomised, controlled study. *Acupunct Med* 2009;27:50-3.
5. Wang SM, Dezinno P, Lin EC, *et al.* Auricular acupuncture as a treatment for pregnant women who have low back and posterior pelvic pain: a pilot study. *Am J Obstet Gynecol* 2009;201:271 e1-9.
6. Elden H, Fagevik-Olsen M, Ostgaard HC, *et al.* Acupuncture as an adjunct to standard treatment for pelvic girdle pain in pregnant women: randomised double-blinded controlled trial comparing acupuncture with non-penetrating sham acupuncture. *BJOG* 2008;115:1655-68.
7. Guittier MJ, Klein TJ, Dong H, *et al.* Side-effects of moxibustion for cephalic version of breech presentation. *J Altern Complement Med* 2008;14:1231-3.
8. Guerreiro da Silva JB. Acupuncture for mild to moderate emotional complaints in pregnancy--a prospective, quasi-randomized, controlled study. *Acupunct Med* 2007;25:65-71.

9. Guerreiro da Silva JB, Nakamura MU, Cordeiro JA, *et al.* Acupuncture for insomnia in pregnancy--a prospective, quasi-randomised, controlled study. *Acupunct Med* 2005;23:47-51.
10. Elden H, Ladfors L, Olsen MF, *et al.* Effects of acupuncture and stabilizing exercises as adjunct to standard treatment in pregnant women with pelvic girdle pain: randomised single blind controlled trial. *BMJ* 2005;330:761.
11. Elden H, Ostgaard HC, Fagevik-Olsen M, *et al.* Treatments of pelvic girdle pain in pregnant women: adverse effects of standard treatment, acupuncture and stabilizing exercises on the pregnancy, mother, delivery and the fetus/neonate. *BMC Complement Altern Med* 2008;8:34.
12. Du YH, Xue AJ. Clinical observation of integrative medicine to correct malposition in 50 cases. *Modern J Integr Trad Chin West Med* 2005;14:2727.
13. Cardini F, Lombardo P, Regalia AL, *et al.* A randomised controlled trial of moxibustion for breech presentation. *BJOG* 2005;112:743-7.
14. Guerreiro da Silva JB, Nakamura MU, Cordeiro JA, *et al.* Acupuncture for low back pain in pregnancy--a prospective, quasi-randomised, controlled study. *Acupunct Med* 2004;22:60-7.
15. Kvorning N, Holmberg C, Grennert L, *et al.* Acupuncture relieves pelvic and low-back pain in late pregnancy. *Acta Obstet Gynecol Scand* 2004;83:246-50.
16. Smith C, Crowther C. The placebo response and effect of time in a trial of acupuncture to treat nausea and vomiting in early pregnancy. *Complement Ther Med* 2002;10:210-6.
17. Smith C, Crowther C, Beilby J. Pregnancy outcome following women's participation in a randomised controlled trial of acupuncture to treat nausea and

vomiting in early pregnancy. *Complement Ther Med* 2002;10:78-83.

18. Knight B, Mudge C, Openshaw S, *et al.* Effect of acupuncture on nausea of pregnancy: a randomised, controlled trial. *Obstet Gynecol* 2001;97:184-8.

19. Wedenberg K, Moen B, Norling A. A prospective randomised study comparing acupuncture with physiotherapy for low-back and pelvic pain in pregnancy. *Acta Obstet Gynecol Scand* 2000;79:331-5.

20. Cardini F, Weixin H. Moxibustion for correction of breech presentation: a randomised controlled trial. *JAMA* 1998;280:1580-4.

21. Liang JL, Chen SR, Li YP. Comparative analysis of moxibustion at Zhiyin acupoint and knee-chest posture in correcting breech presentation, report of 320 cases. *Chin Med* 2004;17:11-2.

22. Cardini F, Marcolongo A. Moxibustion for correction of breech presentation: a clinical study with retrospective control. *Am J Chin Med* 1993;21:133-8.

23. De Jonge-Vors C. Reducing the pain: midwifery acupuncture service audit in Birmingham. *Practising Midwife* 2011;14:22-6.

24. Kvorning N, Grennert L, Aberg A, *et al.* Acupuncture for lower back and pelvic pain in late pregnancy: a retrospective report on 167 consecutive cases. *Pain Med* 2001;2:204-7.

25. Ahn BJ, Song HS. A case report of patient in pregnancy with external epicondylitis. *J Kor Acupunct Moxibust Soc* 2011;28:137-41.

26. Bourne A. The use of acupuncture as a treatment for pelvic girdle pain during pregnancy in a multiparous woman. *AACP* 2007;2007:77-85.

27. Cummings M. Acupuncture for low back pain in pregnancy. *Acupunct Med* 2003;21:42-6.
